# Supplementary material for: Genetic Risks and Demographic History of Indigenous Goats of Mongolia Revealed by SNP Genotyping
Source: Preprints.org preprint supplement (doi:10.20944/preprints202112.0238.v1), 2021-12-14
Supplement: Supplementary file 1 [file supplementary]

## Sheet: Лист1
Breed_Country code	Breed name	Continent	Country	N individuals	Asian subset	Local Subset	Paper	Comments
EB	Erchim (Erchim Black)	Asia	Mongolia	28	+	+	current paper	See table 1 for details
DG	Dorgon	Asia	Mongolia	34	+	+	current paper	See table 1 for details
ZB	Buural (Zavkhan Buural)	Asia	Mongolia	35	+	+	current paper	See table 1 for details
UR	Ulgii Red	Asia	Mongolia	37	+	+	current paper	See table 1 for details
GGS	Gobi Guran Saikhan	Asia	Mongolia	33	+	+	current paper	See table 1 for details
ALTM	Altai Mountain	Asia	Russia	33	+		Deniskova et al., 2021	Altai, near mongolian border
ALTW	Altai White Downy	Asia	Russia	20	+		Deniskova et al., 2021	Altai, near mongolian border
DAGD	Dagestan Downy	Europe	Russia	34	+		Deniskova et al., 2021	Caucasus, Asia-Europe border
DAGL	Dagestan Local	Europe	Russia	20	+		Deniskova et al., 2021	Caucasus, Asia-Europe border
KARA	Karachaev	Europe	Russia	36	+		Deniskova et al., 2021	Caucasus, Asia-Europe border
OREN	Orenburg	Asia	Russia	32	+	+	Deniskova et al., 2021	Kazakhstan border
SOVM	Soviet Mohair	Asia	Russia	29	+		Deniskova et al., 2021	Tuva, near mongolian border
SAAN	Saanen	Europe	Russia	33			Deniskova et al., 2021	russian samples of the SAA breed
NJ	Nanjiang	Asia	China	23	+	+	Berihulay et al., 2019	near Mongolian border
QGD	Qinggeda	Asia	China	24	+	+	Berihulay et al., 2019	near Mongolian border
AS	Arbas Cashmere	Asia	China	59	+		Berihulay et al., 2019	breed under strong artificial selection, sampled near mongolian border
JN	Jining Grey	Asia	China	39	+		Berihulay et al., 2019	East China
LY	Luoping Yellow	Asia	China	24	+		Berihulay et al., 2019	South China
GF	Guangfeng	Asia	China	24	+		Berihulay et al., 2019	East China
BEZ	Bezoar	W Asia	Iran	7	+		Colli et al., 2018
IRA	Iranian goat	W Asia	Iran	9	+		Colli et al., 2018
BAB	Barbari	W Asia	Pakistan	16	+		Colli et al., 2018
BRI	Bari	W Asia	Pakistan	25	+		Colli et al., 2018
BUT	Bugituri	W Asia	Pakistan	31	+		Colli et al., 2018
CHA	Chappar	W Asia	Pakistan	9	+		Colli et al., 2018
DDP	Dera Din Panah	W Asia	Pakistan	20	+		Colli et al., 2018
JAT	Jattan	W Asia	Pakistan	15	+		Colli et al., 2018
KAC	Kachan	W Asia	Pakistan	19	+		Colli et al., 2018
KAM	Kamori	W Asia	Pakistan	38	+		Colli et al., 2018
KES	Koh-e-sulmani	W Asia	Pakistan	13	+		Colli et al., 2018
LOH	Lohri	W Asia	Pakistan	17	+		Colli et al., 2018
LOP	Local Pothohari	W Asia	Pakistan	13	+		Colli et al., 2018
PAH	Pahari	W Asia	Pakistan	19	+		Colli et al., 2018
PAT	Pateri	W Asia	Pakistan	27	+		Colli et al., 2018
TAP	Tapri	W Asia	Pakistan	22	+		Colli et al., 2018
TED	Teddi	W Asia	Pakistan	47	+		Colli et al., 2018
THA	Thari	W Asia	Pakistan	16	+		Colli et al., 2018
ANK	Ankara	W Asia	Turkey	18	+		Colli et al., 2018
KIL	Kil	W Asia	Turkey	23	+		Colli et al., 2018
KLS	Kilis	W Asia	Turkey	36	+		Colli et al., 2018
SAA	Saanen	Worldwide	Argentina	16			Colli et al., 2018	*all goats from various locations were grouped as one breed
SAA			Switzerland	41			Colli et al., 2018
SAA			France	56			Colli et al., 2018
SAA			Italy	23			Colli et al., 2018
SAA			Tanzania	15			Colli et al., 2018
SAA			Kenya	2			Colli et al., 2018
SAAxANB	Saanen x Anglo Nubian		Brazil	13			Colli et al., 2018
SAAxCRE	Saanen x Creole		Argentina	13			Colli et al., 2018
SEAxSAA	Small East African x Saanen		Kenya	2			Colli et al., 2018
GALxSAA	Galla x Saanen		Kenya	1			Colli et al., 2018
BOE	Boer	Worldwide	Australia	32			Colli et al., 2018	*all goats from various locations were grouped as one breed
BOE			USA	29			Colli et al., 2018
BOE			Tanzania	4			Colli et al., 2018
BOE			New Zealand	13			Colli et al., 2018
BOE			Zimbabwe	17			Colli et al., 2018
BOE			Uganda	5			Colli et al., 2018
BOE			Switzerland	133			Colli et al., 2018
BOEx			Malawi	3			Colli et al., 2018
BOEx			Uganda	3			Colli et al., 2018
ANG	Angora	Worldwide	Madagascar	7			Colli et al., 2018	*all goats from various locations were grouped as one breed
ANG			Argentina	217			Colli et al., 2018
ANG			France	26			Colli et al., 2018
ANG			South Africa	48			Colli et al., 2018
MLY	Malya	Worldwide	Tanzania	11			Colli et al., 2018	*all goats from various locations were grouped as one breed
MLY			USA	12			Colli et al., 2018
NBN	Nubian	Worldwide	Argentina	13			Colli et al., 2018	*all goats from various locations were grouped as one breed
NBN			Egypt	79			Colli et al., 2018
ALP	Alpine (Camosciata delle Alpi)	Europe	Switzerland	57			Colli et al., 2018	*all goats from various locations were grouped as one breed
ALP			Italy	113			Colli et al., 2018
ALP			France	50			Colli et al., 2018
LNR	Landrance Goat	Europe	Denmark	84			Colli et al., 2018	*all goats from various locations were grouped as one breed
LNR			Finland	20			Colli et al., 2018
LNR			Netherlands	15			Colli et al., 2018
CRS	Corse	Europe	France	29			Colli et al., 2018
FSS	Fosses	Europe	France	24			Colli et al., 2018
PTV	Poitevine	Europe	France	27			Colli et al., 2018
PVC	Provencale	Europe	France	17			Colli et al., 2018
PYR	Pyrenean	Europe	France	26			Colli et al., 2018
ICL	Icelandic Goat	Europe	Iceland	11			Colli et al., 2018
ARR	Traditional Arran	Europe	Ireland	8			Colli et al., 2018
BLB	Bilberry	Europe	Ireland	10			Colli et al., 2018
OIG	Old Irish Goat	Europe	Ireland	13			Colli et al., 2018
OIG	Old Irish goat cross	Europe	Ireland	9			Colli et al., 2018
ARG	Argentata	Europe	Italy	24			Colli et al., 2018
ASP	Aspromontana	Europe	Italy	23			Colli et al., 2018
BIO	Bionda dell'Adamello	Europe	Italy	24			Colli et al., 2018
CCG	Ciociara Grigia	Europe	Italy	16			Colli et al., 2018
DIT	Di Teramo	Europe	Italy	19			Colli et al., 2018
GAR	Garganica	Europe	Italy	15			Colli et al., 2018
GGT	Girgentana	Europe	Italy	24			Colli et al., 2018
JON	Jonica	Europe	Italy	11			Colli et al., 2018
MLS	Maltese sarda	Europe	Italy	12			Colli et al., 2018
MLT	Maltese	Europe	Italy	16			Colli et al., 2018
NIC	Nicastrese	Europe	Italy	20			Colli et al., 2018
ORO	Orobica	Europe	Italy	22			Colli et al., 2018
RME	Rossa Mediterranea	Europe	Italy	30			Colli et al., 2018
SAR	Sarda	Europe	Italy	27			Colli et al., 2018
VAL	Valdostana	Europe	Italy	24			Colli et al., 2018
VSS	Valpassiria	Europe	Italy	24			Colli et al., 2018
CRP	Carpatian goat	Europe	Romania	14			Colli et al., 2018
BEY	Bermeya	Europe	Spain	23			Colli et al., 2018
MAL	Mallorquina	Europe	Spain	18			Colli et al., 2018
MLG	Malaguena	Europe	Spain	40			Colli et al., 2018
MUG	Murciano-Granadina	Europe	Spain	20			Colli et al., 2018
PAL	Palmera (Canaria island breed)	Europe	Spain	15			Colli et al., 2018
RAS	Blanca de Rasquera	Europe	Spain	20			Colli et al., 2018
BAG	Bagot	Europe	UK	1			Colli et al., 2018
OEG	Old English	Europe	UK	-			Colli et al., 2018
KIK	Kiko	N America	USA	11			Colli et al., 2018
LMN	LaMancha	N America	USA	8			Colli et al., 2018
MYO	Myotonic	N America	USA	1			Colli et al., 2018
SCL	San Clemente	N America	USA	1			Colli et al., 2018
SPA	Spanish	N America	USA	17			Colli et al., 2018
CAN	Caninde'	S America	Brazil	23			Colli et al., 2018
CRE	Creole	S America	Argentina	141			Colli et al., 2018
MOX	Moxoto'	S America	Brazil	23			Colli et al., 2018
CAS	Cashmere	Oceania	Australia	44			Colli et al., 2018
RAN	Rangeland	Oceania	Australia	62			Colli et al., 2018
WAD	West African Dwarf	Africa	Nigeria	21			Colli et al., 2018	*all goats from various locations were grouped as one breed
WAD			Cameroon	34			Colli et al., 2018
TOG	Toggenburg	Africa	Kenya	1			Colli et al., 2018	*all goats from various locations were grouped as one breed
TOG			Tanzania	19			Colli et al., 2018
SEA	Small East African	Africa	Kenya	31			Colli et al., 2018	*all goats from various locations were grouped as one breed
SEA			Mozambique	7			Colli et al., 2018
SEA			Uganda	14			Colli et al., 2018
SEA	Admixed Small East African	Africa	Kenya	2			Colli et al., 2018
SEAxALP	Small East African x Alpine	Africa	Kenya	3			Colli et al., 2018
SEAxGAL	Small East African x Galla	Africa	Kenya	17			Colli et al., 2018
SEAxTOG	Small East African x Toggenburg	Africa	Kenya	5			Colli et al., 2018
ABR	Abergelle	Africa	Ethiopia	49			Colli et al., 2018
ALB	Alpine x Boer	Africa	Malawi	5			Colli et al., 2018
AND	Androy	Africa	Madagascar	6			Colli et al., 2018
BAR	Barcha	Africa	Morocco	4			Colli et al., 2018
BAW	Balaka-Ulongwe	Africa	Malawi	12			Colli et al., 2018
BRK	Barki	Africa	Egypt	106			Colli et al., 2018
BUR	Burundi goat	Africa	Burundi	66			Colli et al., 2018
CAM	Cameroon Goat	Africa	Cameroon	37			Colli et al., 2018
CRO	Local Cross	Africa	Uganda	5			Colli et al., 2018
DIA	Diana	Africa	Madagascar	14			Colli et al., 2018
DJA	Djallonke	Africa	Burkina Faso	10			Colli et al., 2018
DRA	Draa	Africa	Morocco	4			Colli et al., 2018
DZD	Dedza	Africa	Malawi	15			Colli et al., 2018
GAL	Galla	Africa	Kenya	23			Colli et al., 2018
GAZ	Gaza	Africa	Mozambique	4			Colli et al., 2018
GHA	Ghazalia	Africa	Morocco	4			Colli et al., 2018
GOG	Gogo	Africa	Tanzania	12			Colli et al., 2018
GSH	Gishu	Africa	Uganda	2			Colli et al., 2018
GUE	Guera	Africa	Mali	16			Colli et al., 2018
GUM	Gumez	Africa	Ethiopia	39			Colli et al., 2018
KAR	Karamonja	Africa	Uganda	19			Colli et al., 2018
KEF	Keffa	Africa	Ethiopia	44			Colli et al., 2018
KIG	Kigezi	Africa	Uganda	4			Colli et al., 2018
LGW	Lilongwe	Africa	Malawi	3			Colli et al., 2018
LND	Landin	Africa	Mozambique	29			Colli et al., 2018
MAA	Maasai	Africa	Tanzania	18			Colli et al., 2018
MAN	Manica	Africa	Mozambique	3			Colli et al., 2018
MAU	Maure	Africa	Mali	13			Colli et al., 2018
MEN	Menabe	Africa	Madagascar	19			Colli et al., 2018
MOR	Moroccan goat	Africa	Morocco	10			Colli et al., 2018
MSH	Mashona	Africa	Zimbabwe	22			Colli et al., 2018
MTB	Matebele	Africa	Zimbabwe	22			Colli et al., 2018
MTBx	Matabele cross	Africa	Zimbabwe	13			Colli et al., 2018
MUB	Mubende	Africa	Uganda	18			Colli et al., 2018
MUB	Admixed Mubende	Africa	Uganda	3			Colli et al., 2018
NAI	Naine	Africa	Mali	14			Colli et al., 2018
NDA	Noire de l'Atlas	Africa	Morocco	4			Colli et al., 2018
NGD	Nganda	Africa	Uganda	11			Colli et al., 2018
NOR	Nord	Africa	Morocco	4			Colli et al., 2018
NRW	Norwegian	Africa	Tanzania	17			Colli et al., 2018
NSJ	Nsanje	Africa	Malawi	6			Colli et al., 2018
OSS	Oasis	Africa	Egypt	70			Colli et al., 2018
PAF	Pafuri	Africa	Mozambique	4			Colli et al., 2018
PEU	Peulh	Africa	Mali	22			Colli et al., 2018
PRW	Pare White	Africa	Tanzania	19			Colli et al., 2018
RSK	Red Sokoto	Africa	Nigeria	19			Colli et al., 2018
SAH	Sahel	Africa	Burkina Faso	15			Colli et al., 2018
SDN	Soudanaise	Africa	Mali	22			Colli et al., 2018
SEB	Sebei	Africa	Uganda	21			Colli et al., 2018
SHL	Sahel	Africa	Nigeria	19			Colli et al., 2018
SID	Saidi	Africa	Egypt	58			Colli et al., 2018
SNJ	Sonjo	Africa	Tanzania	20			Colli et al., 2018
SOF	Sofia	Africa	Madagascar	22			Colli et al., 2018
SOU	Sud Ouest	Africa	Madagascar	8			Colli et al., 2018
TAR	Targui	Africa	Mali	19			Colli et al., 2018
TET	Tete	Africa	Mozambique	2			Colli et al., 2018
THY	Thyolo	Africa	Malawi	9			Colli et al., 2018
TUN	Tunisian	Africa	Tunisia	21			Colli et al., 2018
WYG	Woyito Guji	Africa	Ethiopia	39			Colli et al., 2018
